# Supplementary material for: Next-Generation Sequencing Advances the Genetic Diagnosis of Cerebral Cavernous Malformation (CCM)
Source: MDPI journal article supplement (doi:10.3390/antiox11071294), 2022-06-29
Supplement: s1 [file s1]

**Table S1.** Quantitative real-time PCR primers and probes for characterization of the *KRIT1* genomic deletion in case 7.

| Gene           | Ref Seq     | Exon / Intron | UPL Probe                     | Primer F                      | Primer R                    | Amplicon (nucleotide)                                                                                                                       |
|----------------|-------------|---------------|-------------------------------|-------------------------------|-----------------------------|---------------------------------------------------------------------------------------------------------------------------------------------|
| <i>AKAP9</i>   | NM_005751.5 | Int 16        | #18<br>(cat. no. 04686918001) | tcttttgttagaacctgagg          | aaagaaataaaagcaaacaataaagga | (125 nt)<br>tcttttgttagaacctgaggccatgctttttctgtttatacaattttg<br>agtactaatttacttttaaaftcctgctgatattctaaatctaactcttta<br>ttgttgctttatttcttt   |
|                |             | Int 38        | #7<br>(cat. no. 04685059001)  | gaatatagccagtatccaacagc       | agaaaaatcagaacaatgattacctct | (68 nt)<br>gaatatagccagtatccaacagccccttctccaagcacatgctc<br>ctctgagtaacttagaggtaatcattgttctgatttttct                                         |
| <i>CYP51A1</i> | NM_000786.3 | Ex 1          | #52<br>(cat. no. 04688490001) | accatctgccagcttctctc          | ttcactccgtcggaacact         | (110 nt)<br>cccaatgtcatgaatgtcctttaaagattcttacatgtttatatttattat<br>tgacatgttttactttgtaggctggctctcgtggtaaaactgtaatgaa<br>gctaaatgg           |
| <i>KRIT1</i>   | NM_194456.1 | Int 19        | #54<br>(cat. no. 04688511001) | cccaatgtcatgaatgtccttta       | ccatttagcttcattaacagttttacc | (110 nt)<br>cccaatgtcatgaatgtcctttaaagattcttacatgtttatatttattat<br>tgacatgttttactttgtaggctggctctcgtggtaaaactgtaatgaa<br>gctaaatgg           |
|                |             | Ex 13         | #84<br>(cat. no. 04689089001) | tctgtgaattgaagcatgga          | ttcttgagagagacgcattcc       | (72 nt)<br>tctgttgaattgaagcatggaaataataccacagtgcagcagataat<br>ggaaggaatgcgtctctctcaagaa                                                     |
|                |             | Int 4         | #72<br>(cat. no. 04688953001) | tgaacagtaaagatgcagtcaaa<br>gt | ttgaaaacttttattccacataatca  | (127 nt)<br>tgaacagtaaagatgcagtcaaaagtcattcctggcttgccttttagg<br>cactgtatattctagatagagaacatttttttttaatttttcgac<br>atgattatgtggaataaaagtttcaa |
| <i>ANKIB1</i>  | NM_019004   | Ex 6          | #22<br>(cat. no. 04686969001) | ccaacgatcaggtgttcaaa          | gcgtgtcccaggcattatac        | (62 nt)<br>ccaacgatcaggtgttcaaatgccaactccaccaccaagtgggtat<br>aatgcctgggacacgc                                                               |

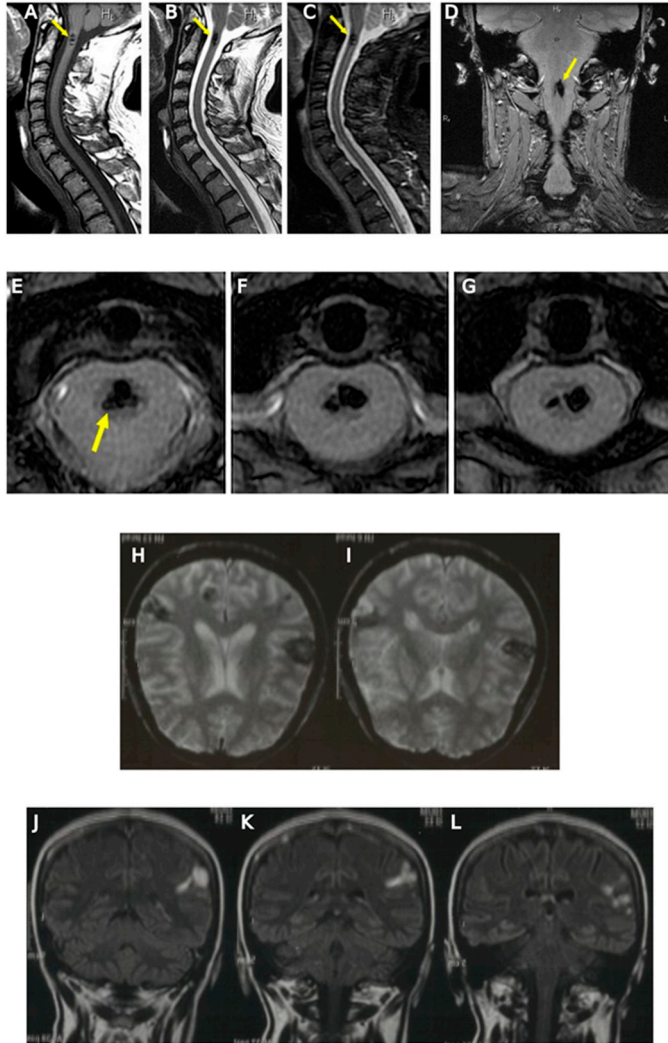

**Figure S1.** MRI of patient II.3 of family 12. Sequential sagittal (panels A-C) and coronal (panel D) MRI sections showing a cavernoma at the foramen magnum, posterior to the odontoid process, characterized by an elongated shape. Sequential axial MRI sections (panels E-G) showing two additional cavernomas in correspondence of the anterolateral horns of the medulla in D2 and the cauda equina in L3. Sequential transversal (panel H, I) and coronal (panels J-L) MRI section showing lesions in the left superficial white matter of the frontal lobe.
